# Supplementary material for: Getting older adults back on their bicycle; a pretest-posttest case-control study on the improvement of bicycle balance control
Source: Research Square preprint supplement (doi:10.21203/rs.3.rs-7765021/v1), 2025-12-04
Supplement: Supplementary file 1 [file 1c7b29c66e7d4947e369add9.docx]

Cycling Skill Questionnaire

|  | Complete the boxes below |
| --- | --- |
| My name (first name, surname): |  |
| Date (day-month-year): |  |

# Objective

The objective of this questionnaire is to assess your cycling skill and confidence on the public roads. Cycling skill and confidence partly depends on the environment in which you cycle, and therefore this questionnaire distinguishes between three environments.

# Instructions

Below, three environments are described, and you must indicate whether you rode your bicycle in that environment in the past two weeks. By “riding your bicycle”, we mean starting from a standstill and stopping at a desired location. For every environment, you must indicate what applies to you: (1) I did not ride my bicycle here, (2) I rode my bicycle here, but I try to avoid it, and (3) I rode my bicycle here without problems.

# Assessment by environment

## Environment 1: Without traffic

Examples of an environment without traffic: an empty parking lot, a quiet park.

|  | Select one statement by putting a cross in the box next to it |
| --- | --- |
| I did not ride my bicycle here. |  |
| I rode my bicycle here, but I try to avoid it. |  |
| I rode my bicycle here without problems |  |

## Environment 2: Light traffic

Examples of an environment with light traffic: small roads in an outside area, a bicycle lane on a quiet moment.

|  | Select one statement by putting a cross in the box next to it |
| --- | --- |
| I did not ride my bicycle here. |  |
| I rode my bicycle here, but I try to avoid it. |  |
| I rode my bicycle here without problems |  |

## Environment 3: Busy traffic

Examples of an environment with busy traffic: city center during traffic hours, busy crossroads with mixed traffic (e.g., cars, buses, cyclists, pedestrians).

|  | Select one statement by putting a cross in the box next to it |
| --- | --- |
| I did not ride my bicycle here. |  |
| I rode my bicycle here, but I try to avoid it. |  |
| I rode my bicycle here without problems |  |
